# Supplementary material for: The influence of COVID-19 risk perception and vaccination status on the number of social contacts across Europe: insights from the CoMix study
Source: Springer Nature journal article supplement (doi:10.1186/s12889-023-16252-z), 2023-07-13
Supplement: MOESM2 [file 25767522]

Additional file 2 for: “The influence of COVID-19 risk perceptions and vaccination status on the number of social contacts across Europe: insights from the CoMix study.”

James Wambua<sup>1\*</sup>, Neilshan Loedy<sup>1</sup>, Christopher I Jarvis<sup>2</sup>, Kerry LM Wong<sup>2</sup>, Christel Faes<sup>1</sup>, Rok Grah<sup>3</sup>, Bastian Prasse<sup>3</sup>, Frank Sandmann<sup>3</sup>, Rene Niehus<sup>3</sup>, Helen Johnson<sup>3\*\*</sup>, W. John Edmunds<sup>2</sup>, Philippe Beutels<sup>4,5</sup>, Niel Hens<sup>1,4</sup>, Pietro Coletti<sup>1</sup>

1 Data Science Institute, I-BioStat, Hasselt University, Hasselt, Belgium.

2 Centre for Mathematical Modelling of Infectious Diseases, Department of Infectious Disease Epidemiology, London School of Hygiene and Tropical Medicine, Keppel Street, WC1E 7HT London, UK

3 European Centre for Disease Prevention and Control (ECDC), Boulevard 40, 169 73 Solna, Sweden

4 Centre for Health Economics Research and Modelling Infectious Diseases, Vaccine & Infectious Disease Institute, University of Antwerp, Antwerp, Belgium.

5 The University of New South Wales, School of Public Health and Community Medicine, Sydney, NSW 2033, Australia

\*\* Current address: Health Emergency Preparedness and Response Authority (HERA), European Commission, 1049 Brussels, Belgium.

\* Corresponding author: [james.wambua@uhasselt.be](mailto:james.wambua@uhasselt.be)

1 Additional file 2: Details of country-level ethical approvals or waivers.  
This additional file provides details for the country-level ethical approvals, or waivers, for the protocol and questionnaires used in the countries included in the analysis.

Table S12: Details of the country-level ethical approvals, or waivers, for the countries included in the analysis based on the CoMix study questionnaires and protocol. The table has been adapted from Verelst et al. 2021 [1].

| Country     | Coordinating organization(s)                                           | Ethical Committee                                                                                 | Decision                                                                                                                                     | Date       | Reference                             |
|-------------|------------------------------------------------------------------------|---------------------------------------------------------------------------------------------------|----------------------------------------------------------------------------------------------------------------------------------------------|------------|---------------------------------------|
| Austria     | Austrian National Public Health Institute                              | Ethikkommission der Stadt Wien                                                                    | Waived (Drugs Act, Medical Devices Act and Vienna Hospital Act not applicable)                                                               | 15/06/2020 | MA 15- EK/20-149-VK NZ                |
| Denmark     | Aarhus University                                                      | The Central Denmark Region Committees on Health Research Ethics                                   | Waived (not considered as health research study)                                                                                             | 30/06/2020 | Request 175 / 2020                    |
| France      | Centre Hospitalier Universitaire de Poitiers                           | DCRI Centre Hospitalier Universitaire de Poitiers                                                 | Waived (not considered a 'recherche impliquant la personne humaine telles que définies par l'article R1121-1 du Code de la Santé Publique'). | 20/08/2020 | not applicable                        |
| Poland      | National Institute of Public Health - National Institute of Hygiene    | Komisja Bioetyczna Narodowego Instytutu Zdrowia Publicznego Państwowego Zładadu Higieny, Warszawa | Approved                                                                                                                                     | 26/01/2021 | Opinia nr 5/2020 z dnia 06.08.2020 r. |
| Portugal    | Instituto Nacional de Saude Doutor Ricardo Jorge (INSA)                | Comissão de Ética para a Saúde do Instituto Nacional de Sa_ude Doutor Ricardo Jorge               | Approved                                                                                                                                     | 23/06/2020 | not applicable                        |
| Spain       | Institut de Investigació en Ciències de la Salut Germans Trias i Pujol | Comit'e d'Ètica de la Investigació del Hospital Universitari Germans Trias i Pujol                | Approved                                                                                                                                     | 04/09/2020 | PI-20-242                             |
| Italy       | ISI Foundation                                                         | Comitato di Bioetica d'Ateneo, Università degli studi di Torino                                   | Approved                                                                                                                                     | 20/10/2020 | d65925                                |
| Finland     | Finnish Institute for Health and Welfare (THL)                         | Institutional Review Board of the Finnish Institute for Health and Welfare                        | Waived (Medical Research Act not applicable)                                                                                                 | 18/12/2020 | not applicable                        |
| Switzerland | University of Bern                                                     | Gesundheits-, Sozial- und Integrationsdirektion Kantonale Ethikkommission für die Forschung       | Approved                                                                                                                                     | 21/12/2020 | 2020-02926                            |
| Lithuania   | Vilnius University                                                     | LITHUANIAN BIOETHICS COMMITTEE                                                                    | Waived (Law on Ethics of Biomedical Research of the Republic of Lithuania not applicable)                                                    | 20-11-2020 | No. 6B-20-298/1                       |
| Greece      | University of West Attica (UniWA)                                      | Research Ethics Committee (E.H.D.E.)University of West Attica (PADA)                              | Approved                                                                                                                                     | 25/01/2021 | 4857 / 21-01-2021                     |
| Slovenia    | National Institute of Public Health                                    | Komisija Republike Slovenije za medicinsko etiko (KME RS)                                         | Approved                                                                                                                                     | 29/12/2020 | 0120-534/2020/14                      |
| Croatia     | Croatian Institute of Public Health (CIPH)                             | Etiko povjerenstvo Hrvatskog zavoda za javno zdravstvo (HZJZ)                                     | Approved                                                                                                                                     | 16/02/2021 | Ur. broj: 381-15-21-2                 |
| Estonia     | National Institute for Health Development                              | Research Ethics Committee of the National Institute for Health Development                        | Approved                                                                                                                                     | 02/03/2021 | 673                                   |
| Hungary     | University of Szeged                                                   | Health Science Council Scientific and Research Ethics Committee (ETT TUKEB)                       | Approved                                                                                                                                     | 21/04/2021 | IV/3075- 1 /2021/EKU                  |
| Slovakia    | Comenius University in Bratislava                                      | Eticka komisija Univerzita Komenskeho v Bratislave Jesseniova lekarska fakulta v Martine          | Approved                                                                                                                                     | 18/05/2020 | EK 2/2021                             |

## References

1. Verelst F, Hermans L, Vercruyse S, Gimma A, Coletti P, Backer JA, Wong KL, Wambua J, van Zandvoort K, Willem L, Bogaardt L. SOCRATES-CoMix: a platform for timely and open-source contact mixing data during and in between COVID-19 surges and interventions in over 20 European countries. *BMC medicine*. 2021 Dec;19(1):1-7.
